# Supplementary material for: AKIP1, a Cardiac Hypertrophy Induced Protein that Stimulates Cardiomyocyte Growth via the Akt Pathway
Source: Int J Mol Sci. 2013 Oct 28;14(11):21378–93. doi: 10.3390/ijms141121378 (PMC3856010; doi:10.3390/ijms141121378)
Supplement: Supplementary file 1 [file ijms-14-21378-s001.pdf]

## Supplementary Information

**Figure S1.** (A) *ANP* gene expression was significantly upregulated in Ren2 rat hearts as compared to SD rat hearts (\*  $p < 0.01$  compared to SD group,  $n = 8$ ); (B) *ANP* gene expression was significantly upregulated in post-MI rat hearts as compared to sham control rat hearts (\*  $p < 0.01$ ,  $n = 7-8$ ). mRNA expression was normalized to *GAPDH* for both experiments.

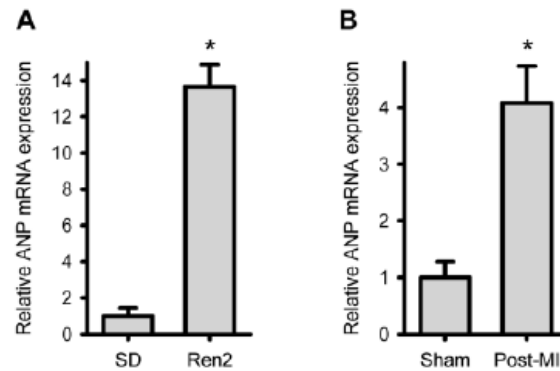

**Figure S2.** Specificity of anti-AKIP1 antibody was confirmed by dot blot. 25 ng of recombinant full-length AKIP1 or BSA was dropped on nitrocellulose membranes and the membranes were blocked with 5% milk followed by incubation with anti-AKIP1 antibody. Different dilutions of antibody were used to confirm the specificity.

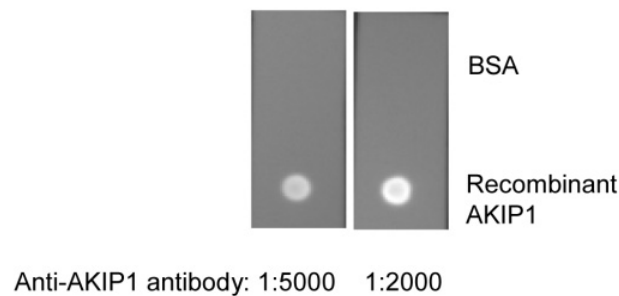

**Figure S3.** *AKIP1* gene expression does not change in cultured cardiac fibroblasts after stimulation with different agents. Cultured neonatal rat cardiac fibroblasts were starved for 24 h and stimulated with PE (50  $\mu$ M) or TGF- $\beta$  (5 ng/mL) for 24 h. *AKIP1* mRNA expression in these cells was determined by RT-PCR and expression was normalized to *GAPDH*. No significant differences were observed ( $n = 4$ ).

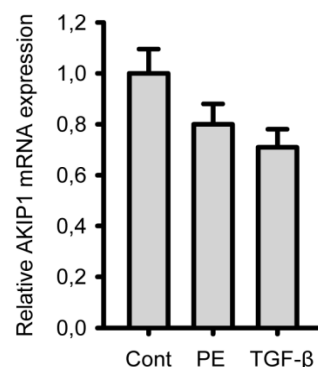

**Figure S4.** AKIP1-induced hypertrophy in cardiomyocytes is dose dependent. Cells were infected overnight by control or AKIP1 adenovirus at different MOI (from 1 to 10) followed by 48 h starvation. Protein was detected by anti-AKIP1 antibody and representative blot is shown. Tubulin was used as loading control. Hypertrophy effect was measured by [3H]-leucine incorporation, which reveals a dose dependent effect (\*  $p < 0.05$  as compared to AdControl group,  $n = 6$ ).

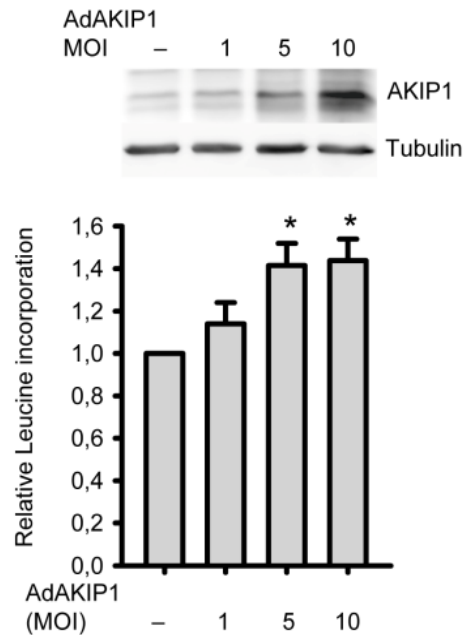

**Figure S5.** AKIP1 can further increase ET-1- and Iso-induced cardiac hypertrophy. Cells were infected overnight with adenovirus followed by 48 h starvation with or without ET-1 (10 nM) or Iso (10  $\mu$ M) treatment for 24 h (\*  $p < 0.01$  as compared with AdControl group,  $n = 8$ ; #  $p < 0.01$  compared with ET-1 or Iso group,  $n = 8$ ). (A) AKIP1 could further increase ET-1 induced cardiac hypertrophy; (B) AKIP1 could further increase Iso induced cardiac hypertrophy.

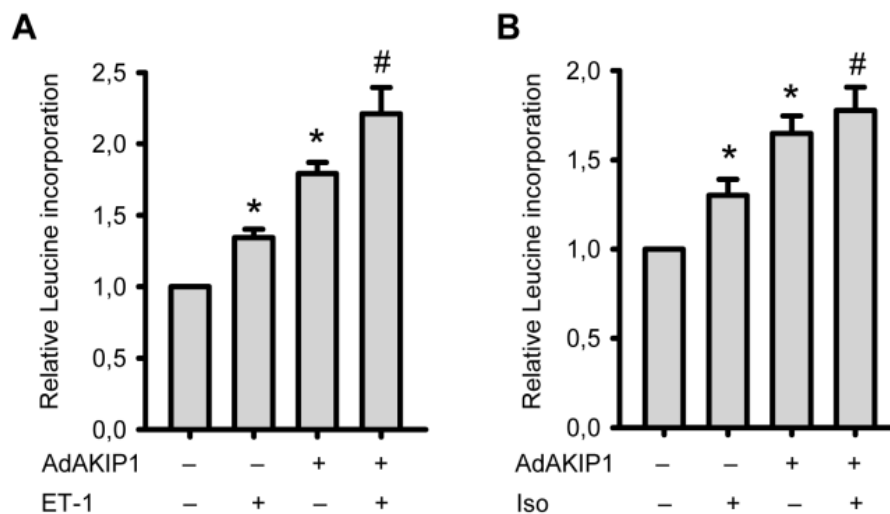

**Figure S6.** (A) AKIP1 did not co-immunoprecipitate with PKA in cardiac cells. Cardiac HL-1 cells were infected with myc-AKIP1 adenoviruses for 24 h, followed by 24 h starvation. Cell lysates were incubated with myc-specific antibodies on protein G beads (Santa Cruz) at 4 °C overnight. After extensive washing with PBS, the beads were boiled in sample buffer and subjected to western blotting with anti-PKA (Cell Signaling) or anti-myc 9E10 antibody; (B) AKIP1 did not activate PKA. Cells were infected overnight with control or myc-AKIP1 adenovirus followed by 24 h of starvation. Total protein (20 µg/lane) was separated by SDS-PAGE and subjected to immunoblotting for phospho- and total PKA protein (anti-phosphorylated-PKA<sup>Thr197</sup> and anti-total-PKA antibodies were from cell signaling and used as a dilution of 1:1000). GAPDH was used as loading control. Representative blots are shown ( $n = 3$ ); (C) AKIP1 overexpression did not induce *MCIP1* gene expression in NRVCs. Gene expression was normalized to *Cyclophilin A* expression ( $n = 5$ ).

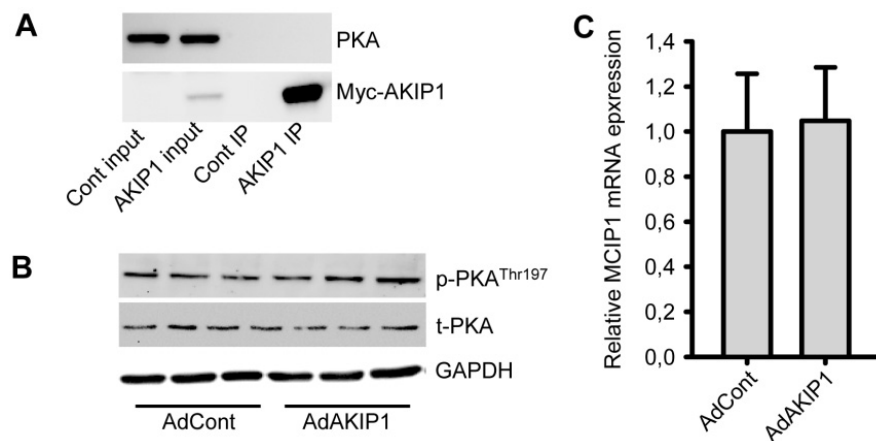

**Figure S7.** (A) Akt phosphorylation was strongly induced by IGF-1 (10 nM, 5 mins) and ERK phosphorylation was induced by both IGF-1 (10 nM, 5 mins) and PE (50 µM, 5 mins) in NRVCs; (B) siAKIP1 could not block IGF-1 induced hypertrophy as measured by leucine incorporation. Cells were infected overnight with AdControl or AdAKIP1 adenovirus, followed by 48 h starvation with or without IGF-1 (10 nM) for 24 h (\*  $p < 0.05$  compared to AdControl group,  $n = 5$ ); (C) Akt inhibitor, MK-2206, did not inhibit IGF-1 induced cardiac hypertrophy. Cells were stimulated as above, MK-2206 (10 nM) was added in indicated wells 30 mins before IGF-1 (\*  $p < 0.05$  compared to AdControl group,  $n = 3$ ).

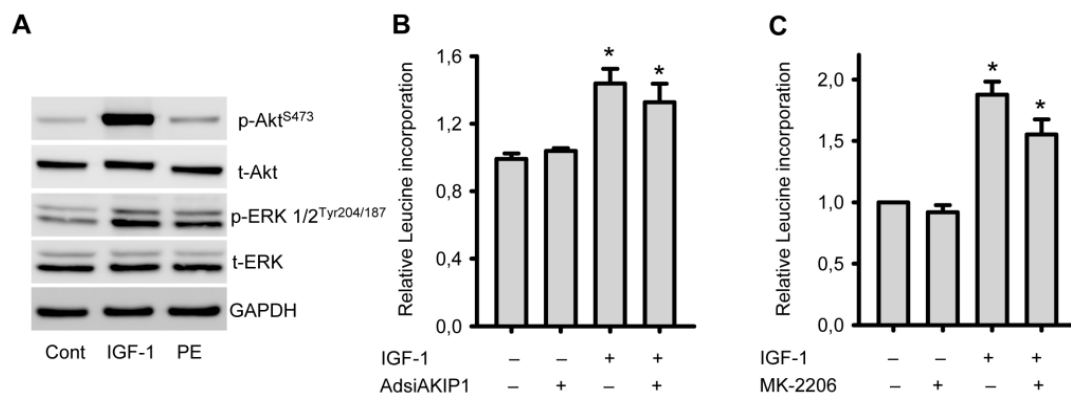

**Figure S8.** Inhibition of PI3K with LY294002 (10  $\mu$ m) could fully block AKIP1 induced hypertrophy as measured by protein synthesis. Cells were infected overnight with AdControl or AdAKIP1 followed by starvation for 48 h with or without LY294004 treatment for 24 h (\*  $p < 0.05$  compared to AdControl group; #  $p < 0.05$  compared to AdAKIP1 group,  $n = 3$ ).

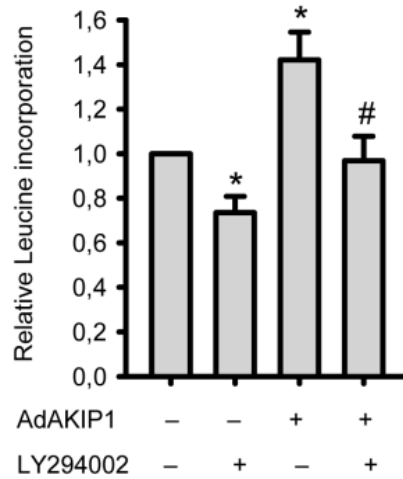

**Table S1.** Baseline characteristics of rat HF models.

|                 | SD          | REN2          | MI-sham      | MI            |
|-----------------|-------------|---------------|--------------|---------------|
| <i>n</i>        | 12          | 12            | 9            | 12            |
| SBP, mmHg       | 120 ± 4     | 112 ± 8       | 114 ± 14     | 108 ± 4       |
| DBP, mmHg       | 83 ± 2      | 78 ± 6        | 88 ± 3       | 78 ± 4        |
| HR, beats/min   | 352 ± 17    | 347 ± 12      | 300 ± 17     | 274 ± 11      |
| LVEDP, mmHg     | 5 ± 1       | 10 ± 1 *      | 13 ± 3       | 22 ± 1 #      |
| LVESF, mmHg     | 121 ± 3     | 100 ± 5       | 125 ± 6      | 108 ± 4 #     |
| dPdtmax, mmHg/s | 7993 ± 290  | 5625 ± 356 *  | 11847 ± 761  | 9180 ± 537 #  |
| dPdtmin, mmHg/s | -9211 ± 666 | -5730 ± 335 * | -10368 ± 800 | -7311 ± 595 # |
| HW/BW, mg/g     | 3.3 ± 0.1   | 5.2 ± 0.1 *   | 3.0 ± 0.9    | 4.0 ± 0.7 #   |
| BW, g           | 367 ± 6     | 309 ± 7 *     | 293 ± 5      | 281 ± 5       |

Summary of functional cardiac parameters of animals used in this study. The full studies have been published before [21,22]. Data are presented as means ± SE. HF, heart failure; SD, Sprague-Dawley; MI, myocardial infarction; SBP, systolic blood pressure; DBP, diastolic blood pressure; HR, heart rate; LVEDP, left ventricular end diastolic pressure; LVESF, left ventricular end systolic pressure; dPdtmax and dPdtmin are indexes of maximal contraction and relaxation; HW, heart weight; BW, body weight. \*Values were significantly different ( $p < 0.05$ ) from SD; #values were significantly different ( $P < 0.05$ ) from sham.

**Table S2.** Primers used for cloning.

| Primers         | 5'-3'                                                                |
|-----------------|----------------------------------------------------------------------|
| AKIP1-forward   | GAAGGATCCGTCGACATGGAATACTGCCTGGCGGC                                  |
| AKIP1-reverse   | GAAGTCGAGTCATACGGGGAACACCAAGTCCAC                                    |
| siAKIP1-forward | GATCCCGTGGTTGCAGTTGACTCGTTCAAGAGAGACCGAGTC<br>AACTGCAACCACTTTTGGAAA  |
| siAKIP1-reverse | AGCTTTTCCAAAAAGTGGTTGCAGTTGACTCGGTCTCTTGAAC<br>CGAGTCAACTGCAACCAACGG |

**Table S3.** Primers used for Real-Time PCR

| <b>Genes</b>        | <b>5'-3' forward</b>    | <b>5'-3' reverse</b>   |
|---------------------|-------------------------|------------------------|
| <i>GAPDH</i>        | CATCAAGAAGGTGGTGAAGCGC  | ACCACCCTGTTGCTGTAG     |
| <i>CyclophilinA</i> | CAGATCGAGGGATCGATTGAG   | TCACCACTTGACACCCTCATTC |
| <i>AKIP1</i>        | TGGTCCAGGAAGCATCTATC    | CAACCACATGCGTCTTCTTG   |
| <i>ANP</i>          | ATGGGCTCCTTCTCCATCAC    | TCTACCGGCATCTTCTCCTC   |
| <i>β-MHC</i>        | GTCAAGCTCCTAAGTAATCTGTT | GAAAGGATGAGCCTTTCTTTGC |
| <i>MCIP1</i>        | AGCGAAAGTGAGACCAGGGC    | GGCAGGGGGAGAGATGAGAA   |

© 2013 by the authors; licensee MDPI, Basel, Switzerland. This article is an open access article distributed under the terms and conditions of the Creative Commons Attribution license (<http://creativecommons.org/licenses/by/3.0/>).
